# Supplementary material for: Hierarchical ZnO@MnO2@PPy ternary core–shell nanorod arrays: an efficient integration of active materials for energy storage
Source: Royal Society of Chemistry journal article supplement (doi:10.1039/c5ra06765k), 2015-01-01
Supplement: c5ra06765k1.pdf [file c5ra06765k1.pdf]

## Supporting Information

# Hierarchical ZnO@MnO<sub>2</sub>@PPy Ternary Core-Shell Nanorod Arrays: An Efficient Integration of Active Materials for Energy Storage

Wenqin Ma, Qiangqiang Shi, Honghong Nan, Qingqing Hu, Xiaoting Zheng, Baoyou Geng, Xiaojun Zhang\*

Key Laboratory for Functional Molecular Solids of the Education Ministry of China, College of Chemistry and Materials Science, Center for Nano Science and Technology, Anhui Normal University, Wuhu, 241000, P R China.

Fax: +86-553-3869302; Tel: +86-553-3937135

E-mail: xjzhang@mail.ahnu.edu.cn

### Figure:

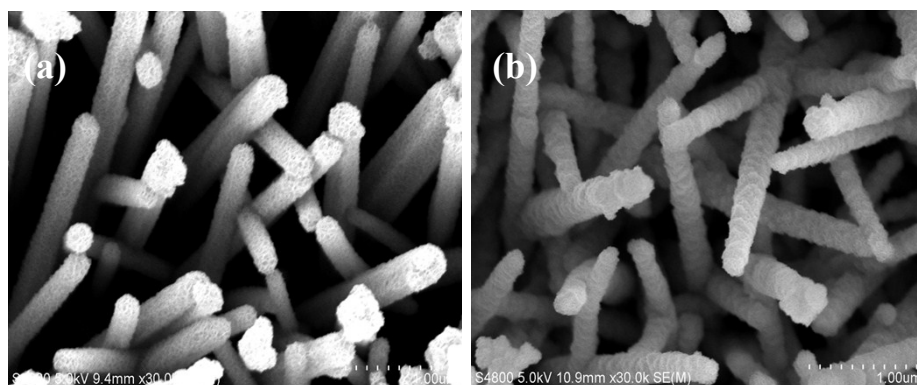

**Figure S1** Typical FESEM images at high magnifications of (a) ZnO@MnO<sub>2</sub> nanorod arrays; (b) ZnO@MnO<sub>2</sub>@PPy nanorod arrays supported on Zn foil.

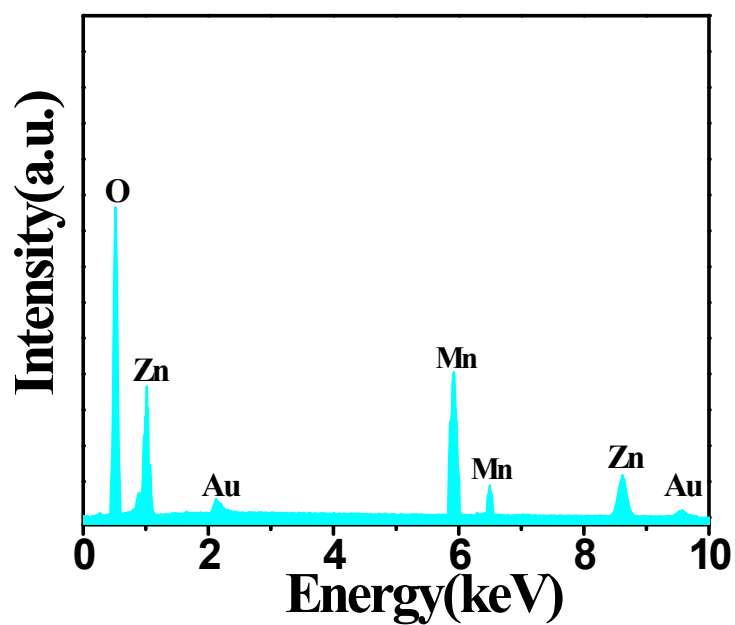

Figure S2 The EDS of the ZnO@MnO<sub>2</sub> nanorod arrays.

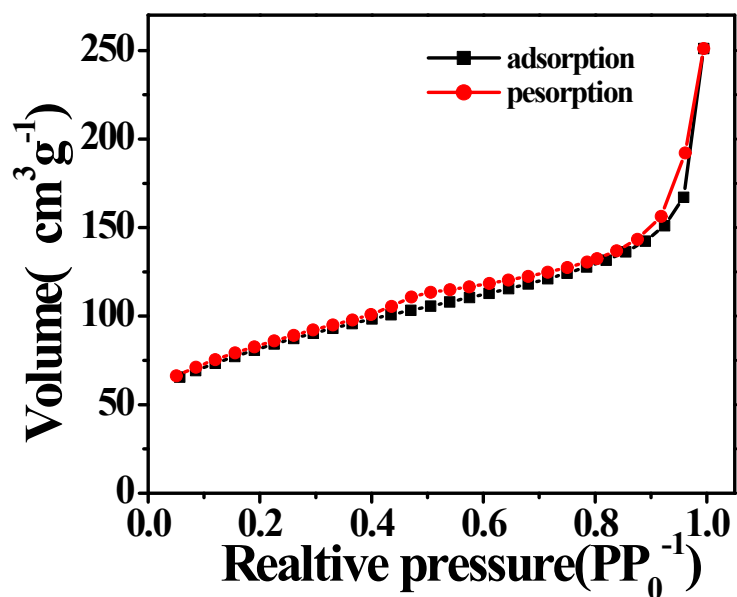

Figure S3 N<sub>2</sub> adsorption-desorption isotherm of the ZnO@MnO<sub>2</sub>@PPy ternary core-shell nanocomposites.

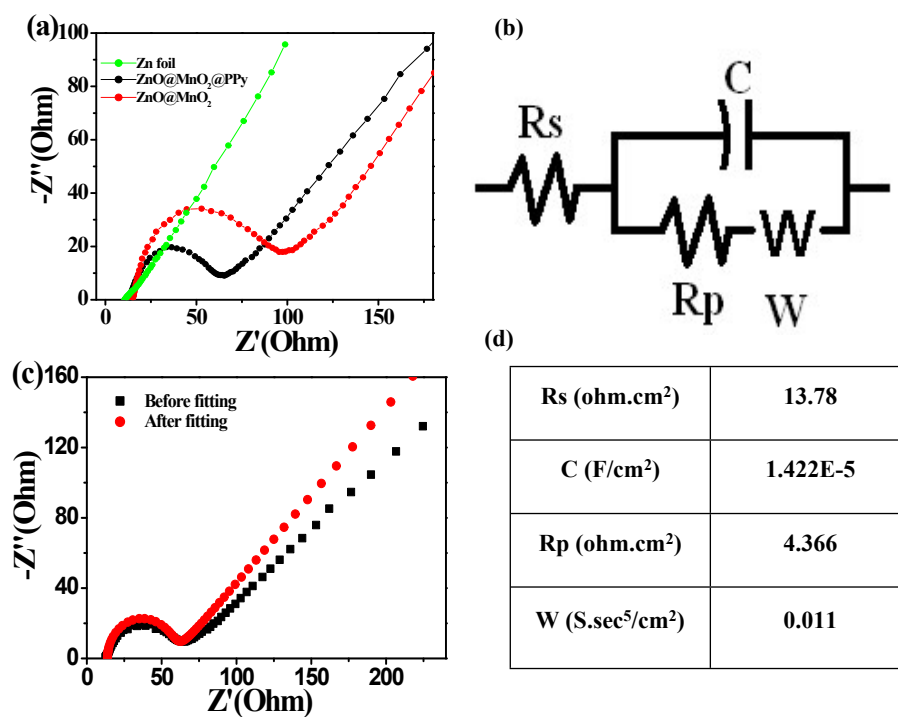

**Figure S4** (a) Impedance Nyquist plots of the ZnO@MnO<sub>2</sub>@PPy nanorod arrays, ZnO@MnO<sub>2</sub> nanorod arrays and Zn foil.(b)The electrical equivalent circuit. (c)The EIS fitting data of the ZnO@MnO<sub>2</sub>@PPy ternary core-shell nanorod arrays.
